# Supplementary material for: Pharmacokinetics and Bioavailability Study of a Prednisolone Tablet as a Single Oral Dose in Bangladeshi Healthy Volunteers
Source: PubMed Central journal article supplement — Dose Response. 2018 Jul 25;16(3):1559325818783932. doi: 10.1177/1559325818783932 (PMC6073839; doi:10.1177/1559325818783932), 2018-07-25
Supplement: Suppl_Material.pdf [file Suppl_Material.pdf]

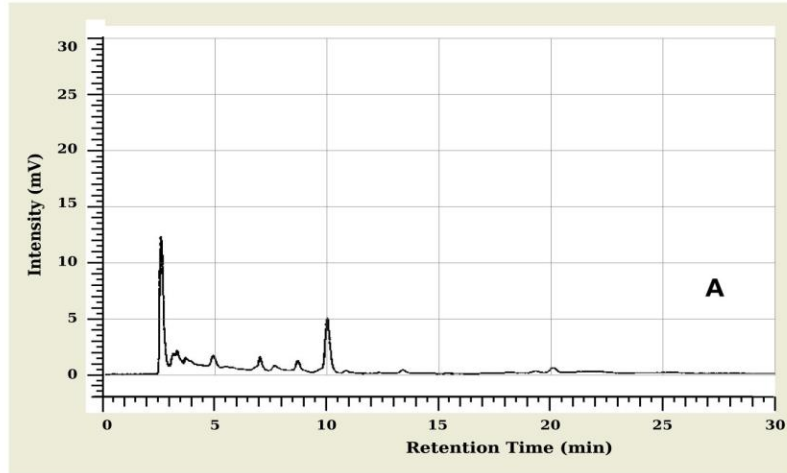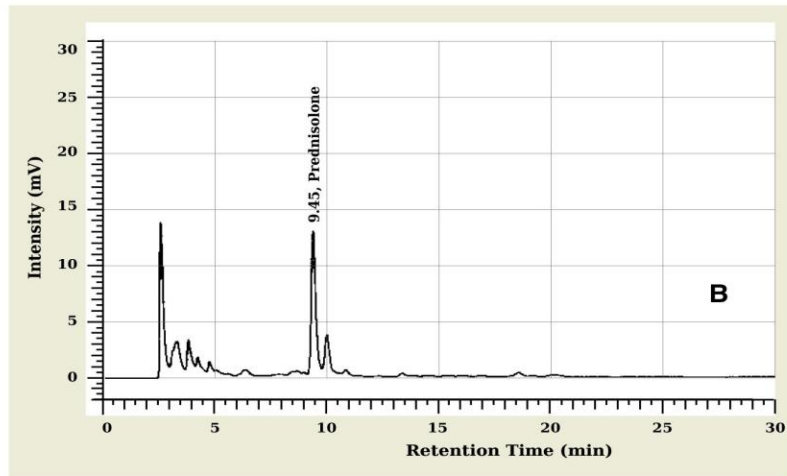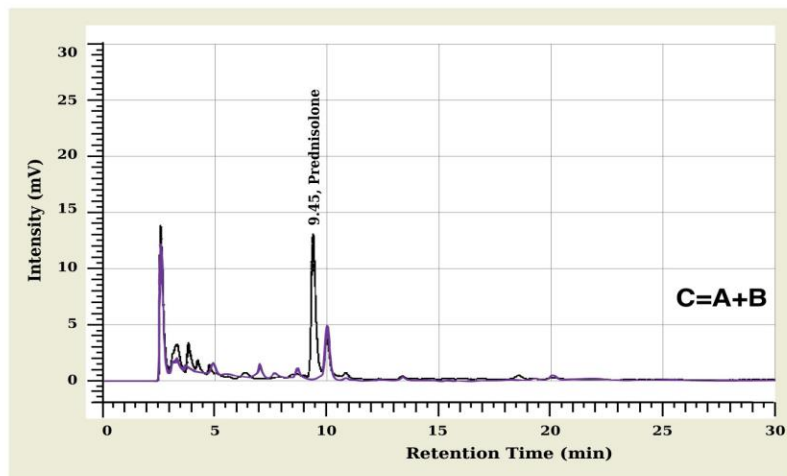

**Supplementary 1:** Representative chromatograms obtained from A) drug-free serum sample B) extracted serum sample from a volunteer 2.0 h after 20 mg oral dose of prednisolone C) Comparative chromatogram after merging A & B.
